# Supplementary material
Source: PubMed Central journal article supplement (PMC3889746)
Supplement: JCM.00676-13_Supplemental_figure_1.pdf [file JCM.00676-13_Supplemental_figure_1.pdf]

# Supplemental Figure 1. Ohtsuru et al

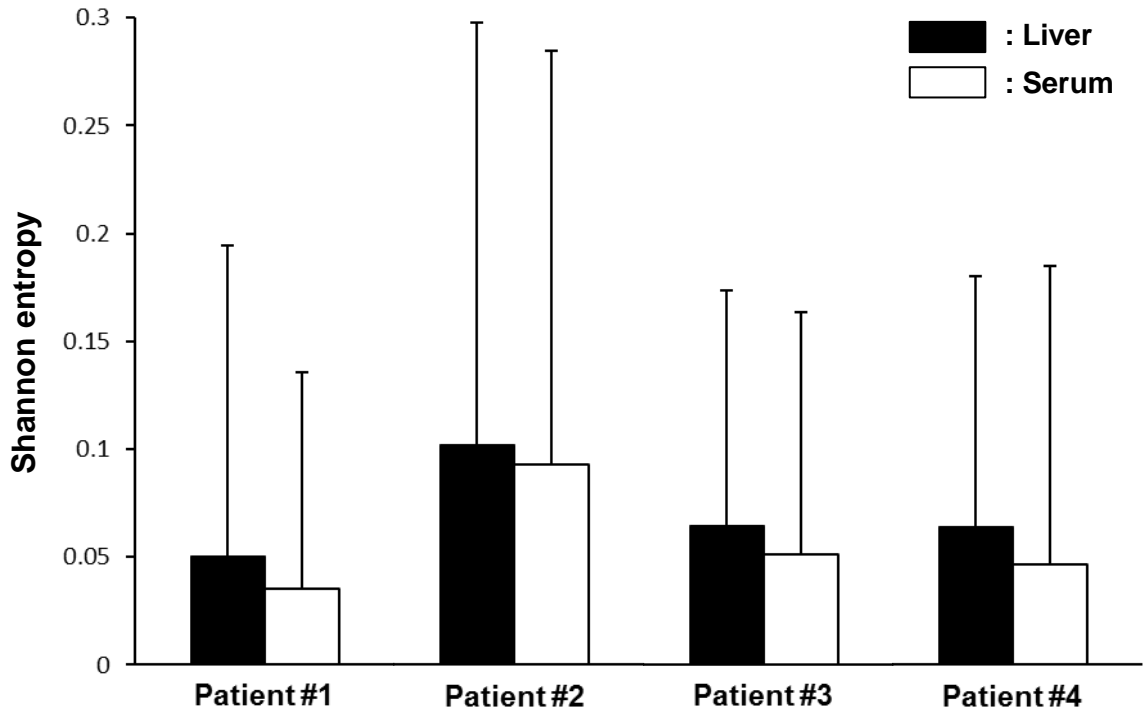

**Supplemental Figure 1. Comparison of the mean Shannon entropy values for HCV genome between the liver and serum of the same individual.**

Mean Shannon entropy values for the overall HCV genome of the liver (black bars) and serum (white bars) in 4 patients are shown. Error bars represent the standard deviation.

# Supplemental Figure 2. Ohtsuru et al

## Patient #2

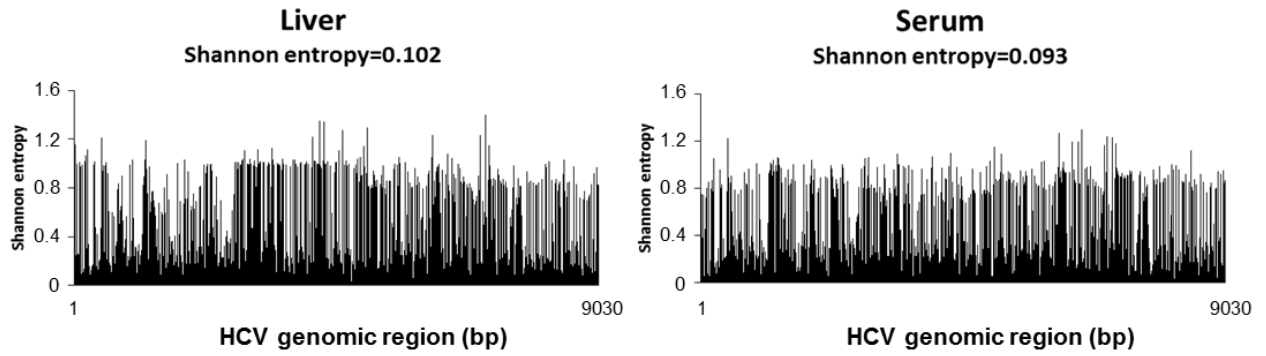

## Patient #3

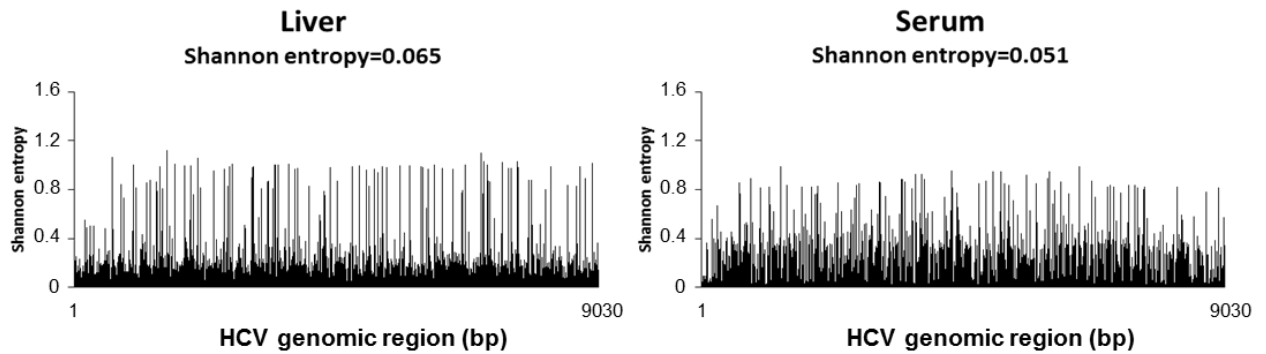

**Supplemental Figure 2. Comparison of viral complexity between the liver and serum of the same individual.**

Shannon entropy values throughout the whole viral genome in the liver and serum of the two representative cases (patients #2 and #3) are shown.
