# Supplementary material
Source: PubMed Central journal article supplement (PMC3889746)
Supplement: JCM.00676-13_zjm999092895st1.pdf [file JCM.00676-13_zjm999092895st1.pdf]

**Supplemental Table 1. Prevalence of anti-HCV drug resistant mutations (%)**

| Patient #                                               |                                                                                   | 1     |       | 2     |       | 3     |       | 4     |       |
|---------------------------------------------------------|-----------------------------------------------------------------------------------|-------|-------|-------|-------|-------|-------|-------|-------|
| Position                                                | Drugs                                                                             | Liver | Serum | Liver | Serum | Liver | Serum | Liver | Serum |
| <b>Core mutations related to interferon sensitivity</b> |                                                                                   |       |       |       |       |       |       |       |       |
| Core70 (Arg)                                            | Interferon                                                                        | 0.54  | 0.26  | 1.95  | 0.92  | 0.28  | 5.64  | 0.44  | 0.32  |
| Core91 (Met)                                            | Interferon                                                                        | 0.07  | 0.04  | 98.66 | 98.27 | 0.84  | 0.33  | 0     | 0     |
| <b>Resistant mutation to NS3/4A protease inhibitor</b>  |                                                                                   |       |       |       |       |       |       |       |       |
| T54S/A                                                  | Telaprevir<br>Boceprevir                                                          | 0.18  | 0.48  | 0.11  | 0.81  | 0.21  | 0.17  | 0.52  | 0.10  |
| V55A                                                    | Boceprevir                                                                        | 0.06  | 0.24  | 0.34  | 0.32  | 0.36  | 0.22  | 0.55  | 0     |
| Q80R/K                                                  | TMC435350                                                                         | 0.38  | 0.54  | 0.29  | 0.27  | 0.21  | 0.12  | 0.28  | 0.21  |
| V36A/M                                                  | Telaprevir<br>Boceprevir                                                          | 0.27  | 0.12  | 0.80  | 0.28  | 0.14  | 0.32  | 0.31  | 0.13  |
| V170A/T                                                 | Boceprevir                                                                        | 0.07  | 0.17  | 0.51  | 0.18  | 0.27  | 0.22  | 0.84  | 0.24  |
| A156T/V                                                 | Telaprevir                                                                        | 0.16  | 0.25  | 0     | 0.25  | 0.18  | 0.13  | 0.23  | 0.23  |
| R155K/T/Q                                               | Telaprevir<br>Boceprevir<br>Vaniprevir<br>TMC435350<br>BI-201335<br>ITMN191/R7227 | 0.11  | 0.05  | 0.18  | 0.25  | 0.09  | 0.22  | 0.03  | 0.12  |
| A156S                                                   | Telaprevir<br>Boceprevir                                                          | 0.05  | 0     | 0     | 0     | 0.09  | 0.20  | 0     | 0     |
| D168A/V/T/H                                             | Vaniprevir<br>TMC435350<br>BI-201335<br>ITMN191/R7227                             | 0     | 0     | 0     | 0.06  | 0.26  | 0.08  | 0.03  | 0     |
| <b>Resistant mutation to NS5B polymerase inhibitor</b>  |                                                                                   |       |       |       |       |       |       |       |       |
| V499A                                                   | BI-207127                                                                         | 0.23  | 0.51  | 0.40  | 0.18  | 0.47  | 0.23  | 0.33  | 0.20  |
| M423T/I/V                                               | Filibuvir                                                                         | 0.76  | 0.70  | 0.76  | 0.68  | 0.51  | 0.30  | 0.67  | 0.23  |
| P495S/L/A/T                                             | BI-207127                                                                         | 0.23  | 0.45  | 0.22  | 0.34  | 0.84  | 0.16  | 0.25  | 0.21  |
| P496A/S                                                 | BI-207127                                                                         | 0     | 0.22  | 0.17  | 0.21  | 0.13  | 0.08  | 0.04  | 0.20  |
| S282T                                                   | R7128                                                                             | 0     | 0     | 0     | 0     | 0     | 0     | 0     | 0     |

**Supplemental Table 1. Prevalence of anti-HCV drug resistant mutations (%)**

The values in the table indicate the frequency of the mutated HCV clones (%) in the liver and serum in the same patient at the sites of the reported mutations that are related to the efficacy of interferon treatment and drug-resistance against HCV protease and polymerase inhibitors.
